# Supplementary material for: Immobilization of ionic liquids in translucent tin dioxide monoliths by sol–gel processing
Source: Royal Society of Chemistry journal article supplement (doi:10.1039/b814978j), 2009-01-01
Supplement: b814978j.pdf [file b814978j.pdf]

### Supplementary informations

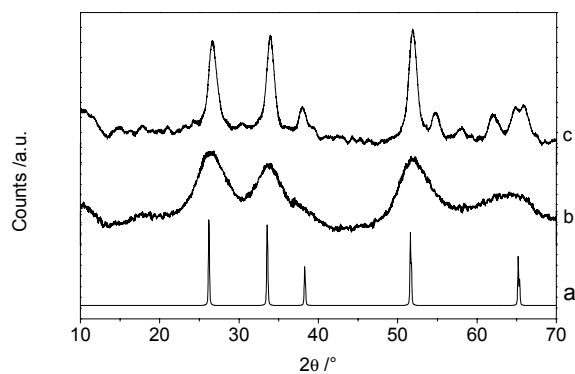

**Fig. S1.** X-ray diffraction pattern of (a) cassiterite  $\text{SnO}_2$  (JCPDS no.41-1445), (b)  $\text{S1}_{\text{Br}}$ , (c)  $\text{S1}_{\text{Br}}^{550}$

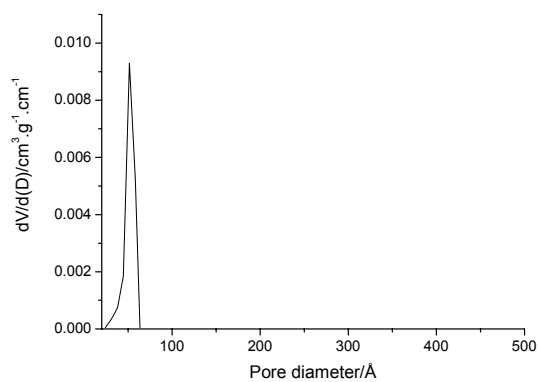

**Fig. S2.** Pore size distribution of  $\text{S2}_{\text{TFSI}}^{550}$
